# Supplementary material for: An NMR crystallography DFT-D approach to analyse the role of intermolecular hydrogen bonding and π–π interactions in driving cocrystallisation of indomethacin and nicotinamide
Source: Royal Society of Chemistry journal article supplement (doi:10.1039/c3ce41240g), 2013-01-01
Supplement: c3ce41240g.pdf [file c3ce41240g.pdf]

## An NMR crystallography approach to analyse the role of intermolecular hydrogen bonding and $\pi$ - $\pi$ interactions in driving co-crystallisation of indomethacin and nicotinamide

Dmytro V. Dudenko, Jonathan R. Yates, Kenneth D. M. Harris, Steven P. Brown

### S1. NICS Map for IND in the IND-NIC 1:1 Cocystal

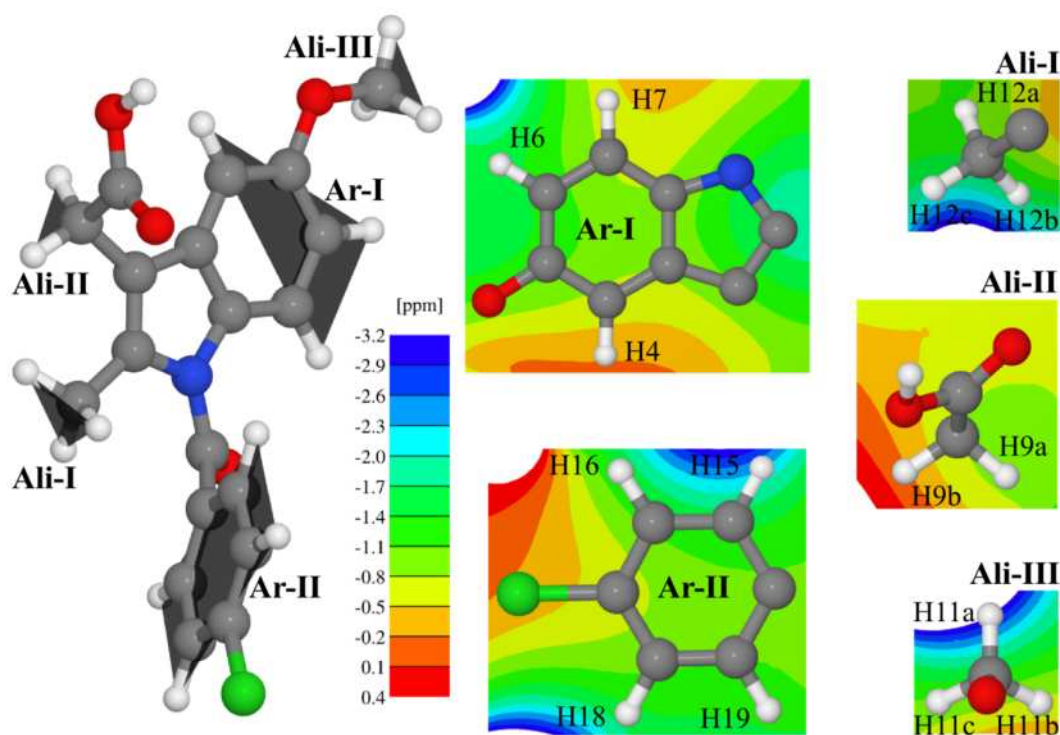

**Fig. S1.** NICS map for IND in the IND-NIC 1:1 cocystal showing the effect of aromatic ring currents on the NMR chemical shifts

## S2. Molecular Fragments Used for Calculating Interaction Energies

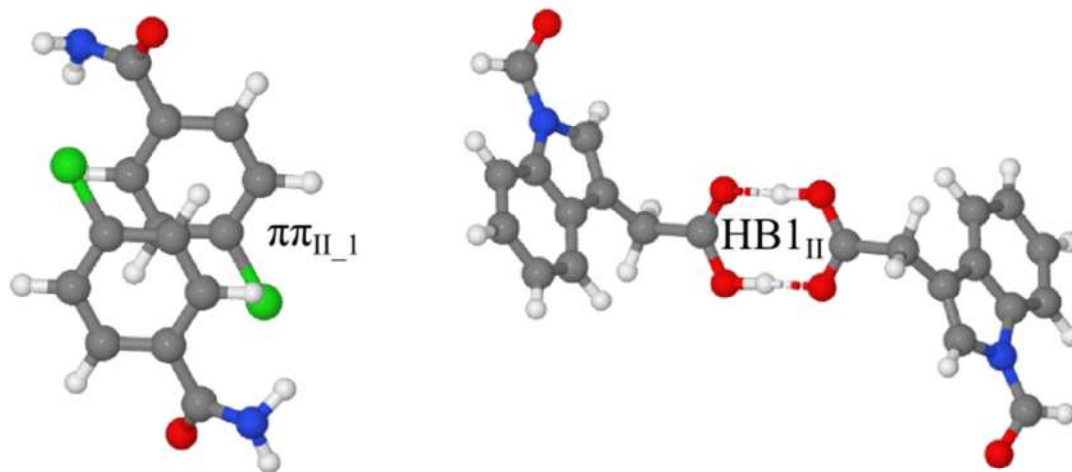

**Fig. S2.** The molecular fragments used to construct the dimer models employed in the calculation of intermolecular hydrogen bonding and  $\pi$ - $\pi$  interactions for the IND- $\gamma$  crystal structure (see Fig. 4 in the main text).

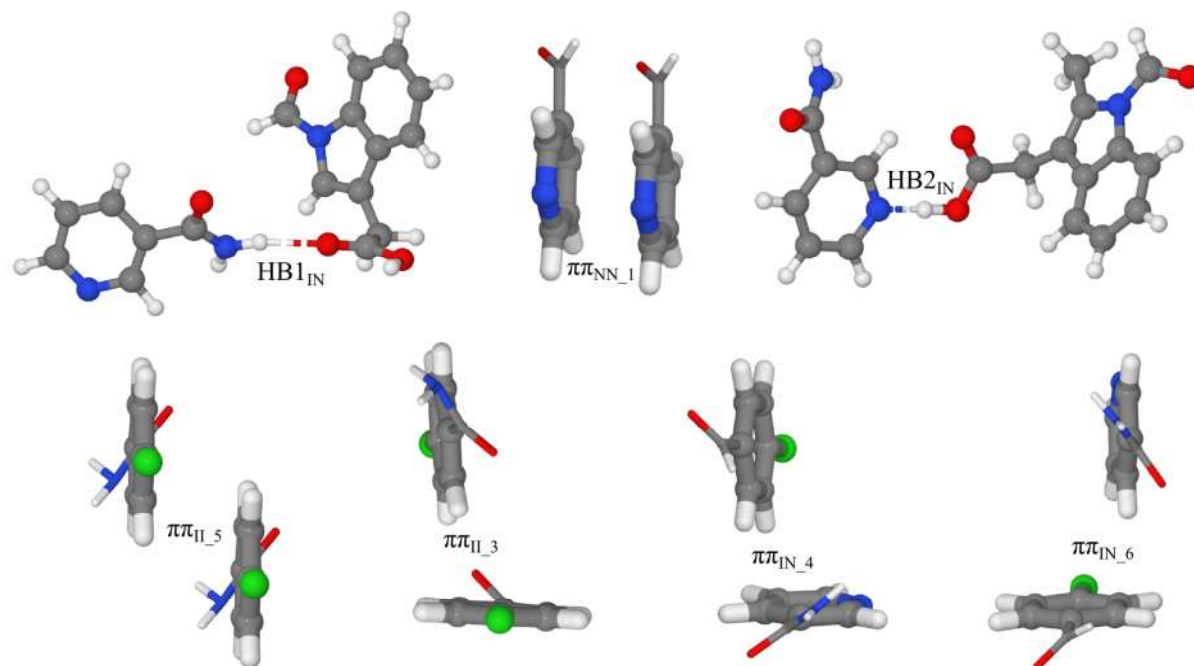

**Fig. S3.** The molecular fragments used to construct the dimer models employed in the calculation of intermolecular hydrogen bonding and  $\pi$ - $\pi$  interactions for the IND-NIC crystal structure (see Fig. 6 in the main text)

### S3. Comparison Calculations for Energetic Contributions

**Table S1.** Test comparisons of DFT method with Grimme energy dispersion correction scheme against corresponding MP2 calculations. Energies are in kcal/mol

| method        | $\pi\pi_{II_1}$ (IND) | $\pi\pi_{NN_1}$ (NIC) | HB2 <sub>NN</sub> (NIC) | HB3 <sub>NN</sub> (NIC) |
|---------------|-----------------------|-----------------------|-------------------------|-------------------------|
| B97D/6-311+G* | 6.1                   | 2.8                   | 9.0                     | 8.1                     |
| MP2/6-311+G*  | 6.6                   | 2.8                   | 7.7                     | 7.7                     |
